# Supplementary material
Source: PubMed Central journal article supplement (PMC8544758)
Supplement: NIHMS1729604-supplement-Supplemental_Material.pdf [file NIHMS1729604-supplement-Supplemental_Material.pdf]

Table S1

Descriptive Statistics of Sample 1 (Psychiatric Inpatients) and Sample 2 (Outpatients)

|                                        | <b>Sample 1</b><br>(Psychiatric Inpatients)<br><i>N</i> =1,010<br>UR=57 | <b>Sample 2</b><br>(Outpatients)<br><i>N</i> =521<br>UR=68 |
|----------------------------------------|-------------------------------------------------------------------------|------------------------------------------------------------|
|                                        | <b>N(%)</b> / <b>M(SD)</b>                                              | <b>N(%)</b> / <b>M(SD)</b>                                 |
| Age                                    | 31.51(13.42)                                                            | 26.84(10.53)                                               |
| Gender                                 |                                                                         |                                                            |
| Male                                   | 531 (52.6%)                                                             | 202(38.8%)                                                 |
| Female                                 | 479 (47.4%)                                                             | 319(61.2%)                                                 |
| Marital Status                         |                                                                         |                                                            |
| Never Married                          | 660 (65.3%)                                                             | 424(81.4%)                                                 |
| Married                                | 202(20.0%)                                                              | 50(9.6%)                                                   |
| Separated                              | 43(4.3%)                                                                | 4(0.8%)                                                    |
| Divorced/Widowed                       | 67(6.6%)                                                                | 43(8.3%)                                                   |
| Race                                   |                                                                         |                                                            |
| White                                  | 858 (85%)                                                               | 389(74.8%)                                                 |
| Black                                  | 11 (1.1%)                                                               | 47(9.0%)                                                   |
| Hispanic                               | 54 (5.3%)                                                               | 57(11.0%)                                                  |
| Asian/Pacific Islander                 | 31 (3.1%)                                                               | 8(1.5%)                                                    |
| American Indian/Alaskan Native         | 1 (0.1%)                                                                | 1(0.2%)                                                    |
| Suicide Attempts                       |                                                                         |                                                            |
| 0                                      | 678 (68.1%)                                                             | 418(80.2%)                                                 |
| 1                                      | 138 (13.7%)                                                             | 72(13.8%)                                                  |
| 2+                                     | 147 (14.6%)                                                             | 31(6.0%)                                                   |
| SUI Uniform <i>T</i> score (Raw score) |                                                                         |                                                            |
| 45 (0)                                 | 494 (48.9%)                                                             | 231 (44.42%)                                               |
| 66 (1)                                 | 186 (18.4%)                                                             | 110 (21.15%)                                               |
| 79 (2)                                 | 124 (12.3%)                                                             | 96 (18.46%)                                                |
| 91 (3)                                 | 89 (8.8%)                                                               | 60 (11.54%)                                                |
| 100 (4+)                               | 117(11.6%)                                                              | 23 (4.42%)                                                 |

Note: Under-reporting (UR) = L-r > 69*T* or K-r > 65*T*;

Table S2

Results of *t*-tests Examining Mean Differences in MMPI-2-RF SUI and Extratest Measures of Suicide Risk Between Underreporting and Non-Underreporting Groups

| UR-based on elevated K-r and/or L-r scale scores |                                                               |                                                                      |                    |                       |          |                           |          |
|--------------------------------------------------|---------------------------------------------------------------|----------------------------------------------------------------------|--------------------|-----------------------|----------|---------------------------|----------|
| Dependent Variable                               | UR<br>(n=57) <sup>†</sup><br>(n=68) <sup>‡</sup><br>Mean (SD) | Non-UR<br>(n= 951) <sup>†</sup><br>(n=453) <sup>‡</sup><br>Mean (SD) | Mean<br>difference | SE<br>Mean Difference | <i>t</i> | Mean<br>Difference 95% CI | <i>d</i> |
| SUI <sup>†</sup>                                 | 0.51 (1.04)                                                   | 1.22 (1.47)                                                          | 0.71               | 0.15                  | 4.90**   | 0.42 – 1.00               | .49      |
| SUI <sup>‡</sup>                                 | 0.66 (.86)                                                    | 1.19 (1.30)                                                          | 0.53               | 0.12                  | 4.37**   | 0.28 -0.76                | .48      |
| Suicide Risk (C-SSRS) <sup>†</sup>               | 4.30 (6.62)                                                   | 8.19 (7.48)                                                          | 3.89               | 0.91                  | 4.28**   | 2.08 – 5.71               | .52      |
| Suicide risk (BSS) <sup>‡</sup>                  | 0.60 (2.34)                                                   | 3.00 (5.38)                                                          | 2.39               | 0.38                  | 6.30**   | 1.64 -3.14                | .59      |
| UR-based on elevated K-r scale scores only       |                                                               |                                                                      |                    |                       |          |                           |          |
| Dependent Variable                               | UR<br>(n=34) <sup>†</sup><br>(n=29) <sup>‡</sup><br>Mean (SD) | Non-UR<br>(n=974) <sup>†</sup><br>(n=492) <sup>‡</sup><br>Mean (SD)  | Mean<br>difference | SE<br>Mean Difference | <i>t</i> | Mean<br>Difference 95% CI | <i>d</i> |
| SUI <sup>†</sup>                                 | 0.26 (.67)                                                    | 1.21 (1.47)                                                          | 0.95               | 0.12                  | 7.69**   | 0.70 – 1.20               | .83      |
| SUI <sup>‡</sup>                                 | 0.72 (.84)                                                    | 1.14 (1.28)                                                          | 0.41               | 0.17                  | 2.51*    | 0.08 – 0.76               | .39      |
| Suicide Risk (C-SSRS) <sup>†</sup>               | 2.76 (4.94)                                                   | 8.15 (7.49)                                                          | 5.39               | 0.88                  | 6.12**   | 3.61 – 7.17               | .85      |
| Suicide risk (BSS) <sup>‡</sup>                  | 0.28 (.92)                                                    | 2.83 (5.26)                                                          | 2.55               | 0.29                  | 8.71**   | 1.97 – 3.13               | .68      |
| UR-based on elevated L-r scale scores only       |                                                               |                                                                      |                    |                       |          |                           |          |
| Dependent Variable                               | UR<br>(n=33) <sup>†</sup><br>(n=46) <sup>‡</sup><br>Mean (SD) | Non-UR<br>(n=975) <sup>†</sup><br>(n=475) <sup>‡</sup><br>Mean (SD)  | Mean<br>difference | SE<br>Mean Difference | <i>t</i> | Mean<br>Difference 95% CI | <i>d</i> |
| SUI <sup>†</sup>                                 | 0.70 (1.26)                                                   | 1.20 (1.46)                                                          | 0.50               | 0.22                  | 2.23*    | 0.04 – 0.96               | .34      |
| SUI <sup>‡</sup>                                 | 0.57 (.83)                                                    | 1.17 (1.28)                                                          | 0.61               | 0.14                  | 4.46**   | 0.34 – 0.88               | .56      |
| Suicide Risk (C-SSRS) <sup>†</sup>               | 5.42 (7.36)                                                   | 8.06 (7.47)                                                          | 2.36               | 1.32                  | 1.99*    | 0.04 – 5.23               | .36      |
| Suicide risk (BSS) <sup>‡</sup>                  | .78 (2.77)                                                    | 2.87 (5.29)                                                          | 2.09               | 0.48                  | 4.39**   | 1.14 – 3.03               | .49      |

Note: <sup>†</sup> Sample 1 (Inpatients); <sup>‡</sup>Sample 2 (Outpatients); UR= Under reporting; Non-UR = Non under reporting; K-r = MMPI-2-RF Adjustment Validity; L-r= MMPI-2-RF Uncommon Virtues; BSS= Beck Scale for Suicide Ideation; C-SSRS = Columbia Suicide Severity Rating Scale; \**p* < .05; \*\**p* < .01; \*\*\**p* < .001; BSS= Beck Scale for Suicide Ideation; C-SSRS = Columbia Suicide Severity Rating Scale; \**p* < .05; \*\**p* < .001; *d*: .20 = Small Effect Size; .50 = Medium Effect Size; .80 = Large Effect Size). UR status is based on L-r > 69*T* or K-r > 65*T*. All mean difference scores reflect higher scores of the non-UR group.

Figure S1. Graphical representation of correlational analyses for Sample 1 (Inpatients).

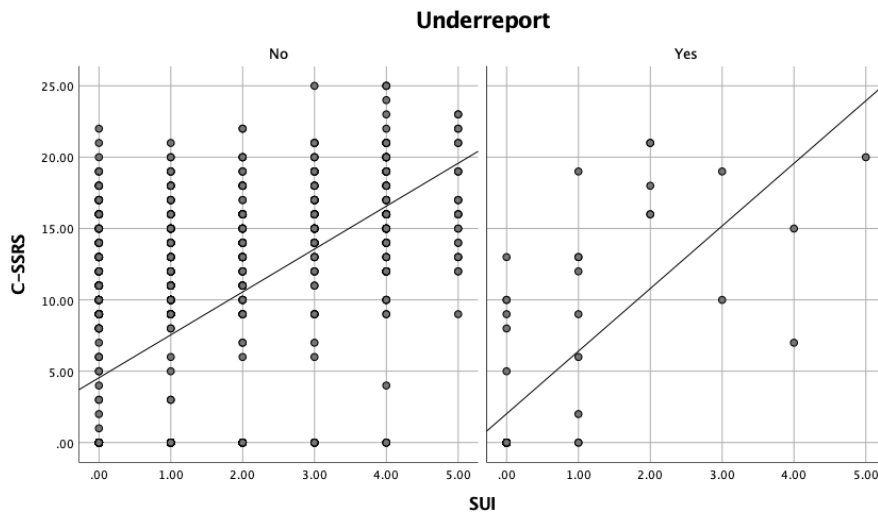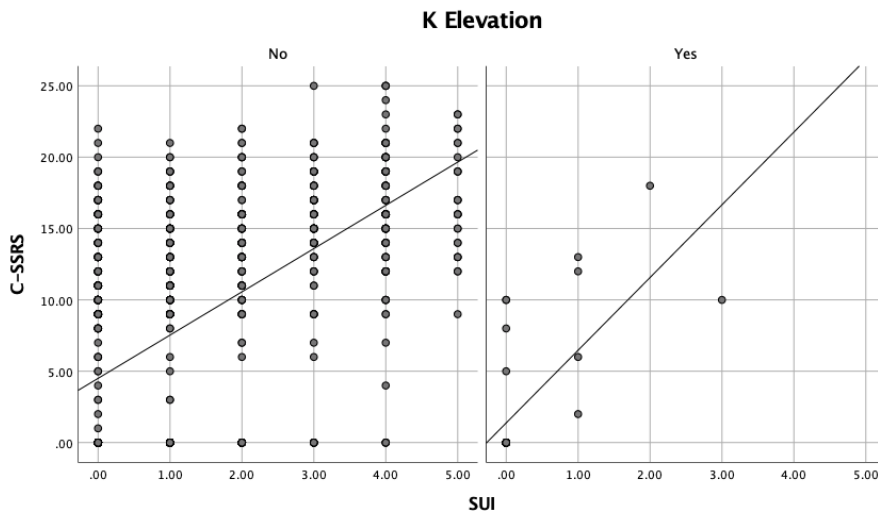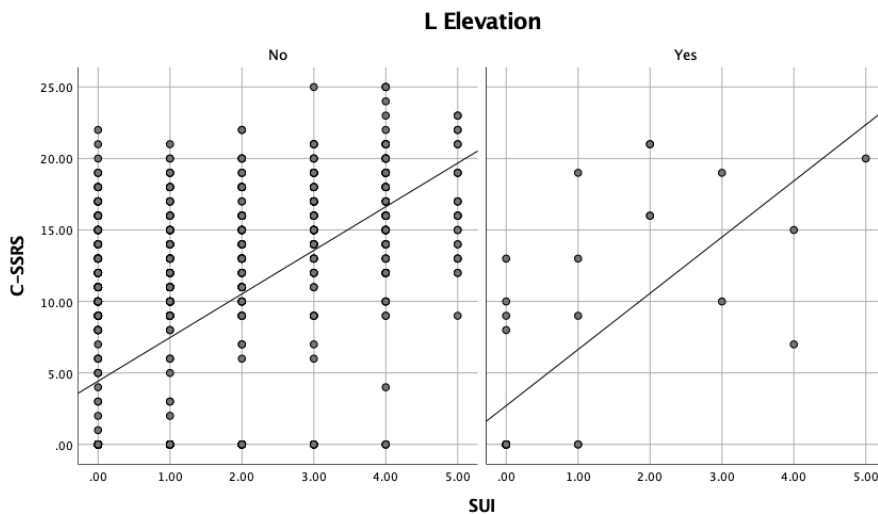

Note: K=MMPI-2-RF Adjustment Validity (K-r); L= MMPI-2-RF Uncommon Virtues (L-r), SUI= MMPI-2-RF Suicidal/Death Ideation Scale; C-SSRS= Columbia Suicide Severity Rating Scale Ideation Intensity Subscale

Figure S2. Graphical representation of correlational analyses for Sample 2 (Outpatients).

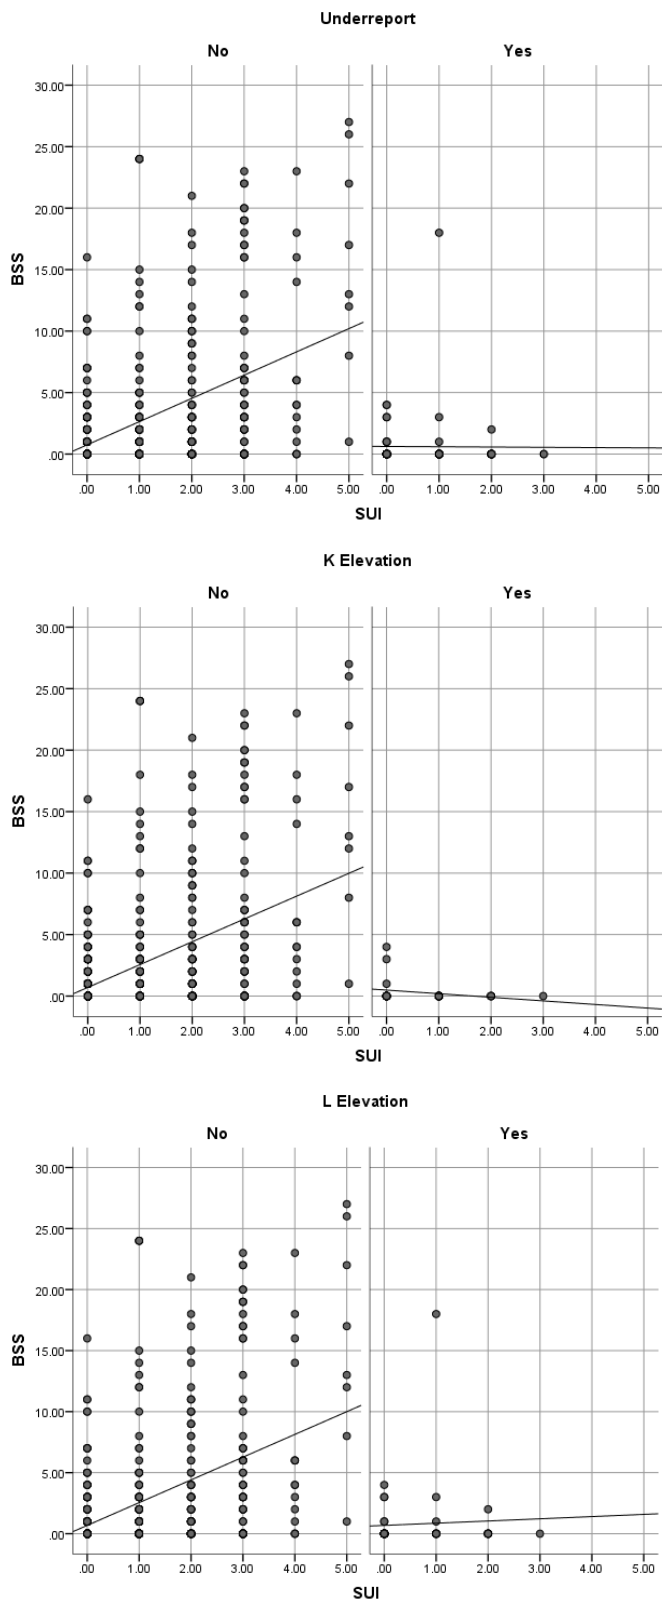

Note: K=MMPI-2-RF Adjustment Validity (K-r); L= MMPI-2-RF Uncommon Virtues (L-r), SUI= MMPI-2-RF Suicidal/Death Ideation Scale; BSS Total= Beck Scale for Suicide Ideation Total
